# Supplementary material for: Identification of mangiferin as a potential Glucokinase activator by structure-based virtual ligand screening
Source: PubMed Central journal article supplement (PMC5357792; doi:10.1038/srep44681), 2017-03-20

## **Supplementary information**

### **Identification of mangiferin as a potential Glucokinase activator by structure-based virtual ligand screening**

Qiuxia Min<sup>1</sup>, Xinpei Cai<sup>1</sup>, Weiguang Sun<sup>1</sup>, Fei gao<sup>1</sup>, Zhimei Li<sup>1</sup>, Qian Zhang<sup>1</sup>,  
Luo-Sheng Wan<sup>1</sup>, Hua Li<sup>1,2,\*</sup>, Jiachun Chen<sup>1,\*</sup>

- a. Hubei Key Laboratory of Natural Medicinal Chemistry and Resource Evaluation, School of Pharmacy, Tongji Medical College, Huazhong University of Science and Technology, Wuhan 430030, China.
- b. Department of Natural Products Chemistry, School of Traditional Chinese Materia Medica, Key Laboratory of Structure-Based Drug Design & Discovery, Ministry of Education, Shenyang Pharmaceutical University, Shenyang 110016, China.

Corresponding Author

\*Tel: +86-27-83692482. E-mail: homespringchen@126.com.

\*Tel: +86-27-83692762. E-mail: li\_hua@hust.edu.cn (Hua Li).

## **Contents of Electronic Supporting Information (ESI)**

### **Tables and figures**

**Table S1. Docking scores / interaction potential of screening hits**

**Table S2. The enzymatic efficacy of screening hits on GK**

**Table S3. Effect of drugs on serum lipids levels in mice**

**Fig. S1. Measurement of binding affinity between compounds and GK by MST in standard capillaries.**

**Fig. S2. Hematoxylin and eosin stained of the (A) liver and (B) abdominal white adipose tissue of groups.**

**Table S1. Docking scores / interaction potential of screening hits**

| <b>Compound</b> | <b>ICM docking score</b> | <b>ICM docking mfscore</b> |
|-----------------|--------------------------|----------------------------|
|                 | <b>(kcal/mol)</b>        | <b>(kcal/mol)</b>          |
| <b>1</b>        | -36.65                   | -90.83                     |
| <b>2</b>        | -36.06                   | -95.76                     |
| <b>3</b>        | -30.0876                 | -37.75                     |
| <b>4</b>        | -33.67                   | -103.7                     |
| <b>5</b>        | -41.642                  | -63.2803                   |
| <b>6</b>        | -33.91                   | -106.5                     |
| <b>7</b>        | -18.3546                 | -130.8188                  |
| <b>8</b>        | -35.0374                 | -81.01                     |
| <b>9</b>        | -27.1581                 | -127.125                   |
| <b>10</b>       | -34.9685                 | -81.71                     |
| <b>11</b>       | -36.1256                 | -99.6449                   |
| <b>12</b>       | -22.9813                 | -135.3                     |

**Table S2. The enzymatic efficacy of screening hits on GK**

| Compound | SC <sub>50</sub> (%) <sup>a</sup> | EC <sub>50</sub> (μM) |
|----------|-----------------------------------|-----------------------|
| none     | 100                               | n.p.                  |
| 1        | 86.13 ± 5.68                      | n.a.                  |
| 2        | 86.46 ± 5.71                      | n.a.                  |
| 3        | 46.73 ± 1.21                      | n.a.                  |
| 4        | 37.84 ± 12.01                     | n.a.                  |
| 5        | 87.63 ± 5.67                      | n.a.                  |
| 6        | 90.00 ± 3.88                      | n.a.                  |
| 7        | 125.78 ± 2.83                     | 156                   |
| 8        | 91.95 ± 0.96                      | n.a.                  |
| 9        | 82.36 ± 6.72                      | n.a.                  |
| 10       | 94.28 ± 1.49                      | n.a.                  |
| 11       | 75.92 ± 6.72                      | n.a.                  |
| 12       | 111.84 ± 2.14                     | >500                  |

<sup>a</sup>Data reported as mean ± SD (n = 3). SC<sub>50</sub> was the activate efficacy of the compound stimulatory concentration of 50 μM. The activity percent of the blank control group (untreated GK group) was setted to 100%.

<sup>b</sup>n.p. is not performed in this study.

<sup>c</sup>n.a. is no activation detected in the experiments.

**Table S3. Effect of drugs on serum lipids levels in mice.** Each value was expressed as mean  $\pm$  SD (n = 6); \* $P$  < 0.05, \*\*  $P$  < 0.01, compared to the diabetic group. Metformin (200mg/kg) was used as positive control.

| Groups | TC (mmol/L)        | TG (mmol/L)       | LDL (mmol/L)    | HDL (mmol/L)      |
|--------|--------------------|-------------------|-----------------|-------------------|
| normal | 14.42 $\pm$ 1.31** | 4.63 $\pm$ 1.85** | 0.38 $\pm$ 0.14 | 3.75 $\pm$ 0.48   |
| model  | 26.0 $\pm$ 2.59    | 12.64 $\pm$ 4.67  | 0.94 $\pm$ 0.48 | 4.16 $\pm$ 0.46   |
| MET    | 27.31 $\pm$ 5.64   | 5.83 $\pm$ 1.14   | 0.39 $\pm$ 0.08 | 3.03 $\pm$ 0.20** |
| 7      | 35.39 $\pm$ 8.12   | 0.99 $\pm$ 0.20*  | 0.33 $\pm$ 0.07 | 2.78 $\pm$ 0.62*  |

**Fig. S1. Measurement of binding affinity between compounds and GK by MST in standard capillaries.** The binding curve were shown. (A)  $K_d$  of  $472 \pm 20.5 \mu\text{M}$  for compound 7, (B)  $600 \pm 36.1 \mu\text{M}$  for compound LY2608204 were calculated.

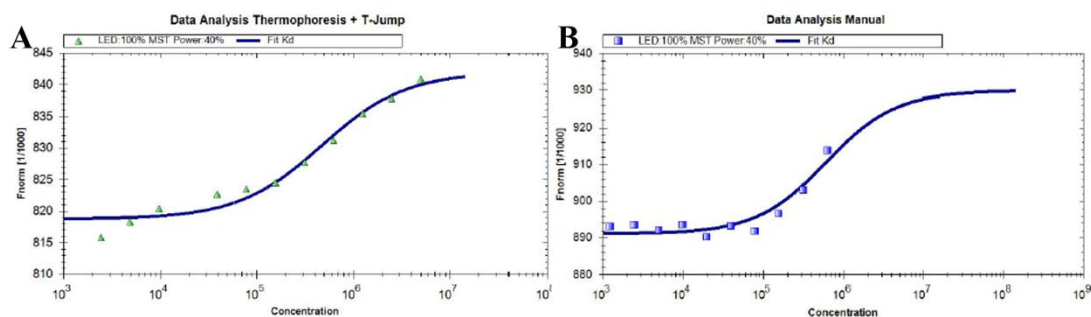

**Fig. S2. Hematoxylin and eosin stained of the (A) liver and (B) abdominal white adipose tissue of groups. (A) the normal group; (B) the diabetic group; (C) the metformin-treated group (200 mg/kg); (D) the 7-treated group. Magnification 200× (liver), 100× (abdominal white adipose tissue) (DXIT 1200, Nikon, Japan).**

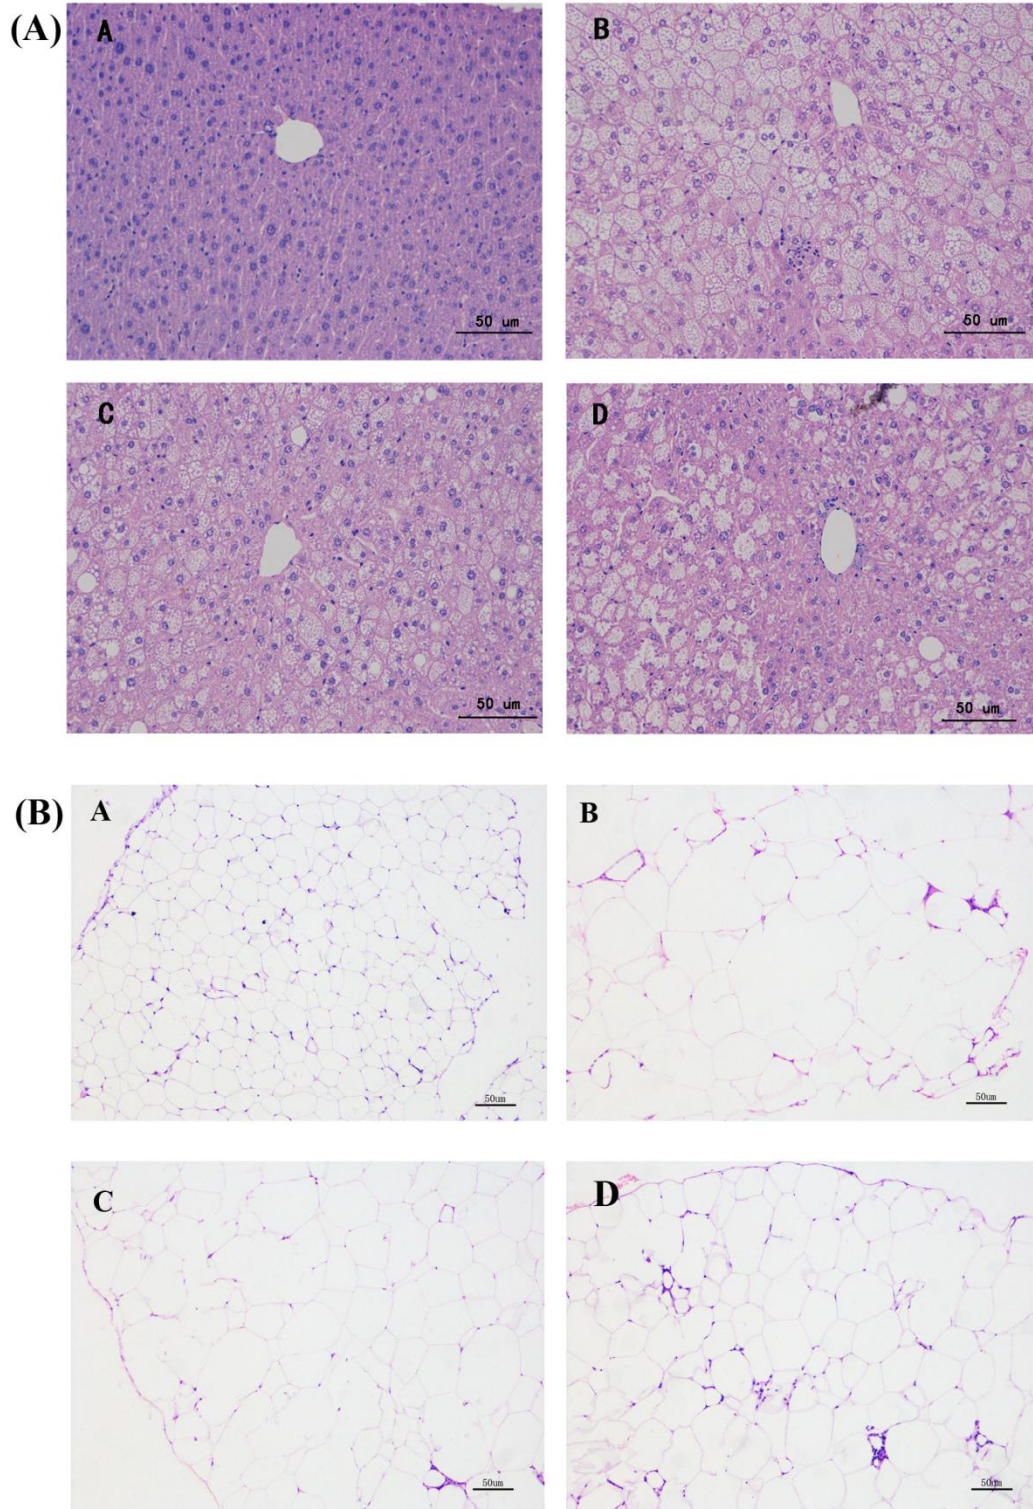

Supplement: srep44681-s1.pdf [file srep44681-s1.pdf]
